# Supplementary material for: Elimination of quiescent slow-cycling cells via reducing quiescence depth by natural compounds purified from Ganoderma lucidum
Source: PubMed Central journal article supplement (PMC5355137; doi:10.18632/oncotarget.14634), 2017-01-13
Supplement: oncotarget-08-13770-s001.pdf [file oncotarget-08-13770-s001.pdf]

## Elimination of quiescent slow-cycling cells via reducing quiescence depth by natural compounds purified from *Ganoderma lucidum*

### Supplementary Materials

**Supplementary Table 1: The Rb-E2F switch model (adapted from ref. [21])**

|                                                                                                                                                                                                                                             |
|---------------------------------------------------------------------------------------------------------------------------------------------------------------------------------------------------------------------------------------------|
| $\frac{d[M]}{dt} = \frac{k_M[S]}{K_S + [S]} - d_M[M]$                                                                                                                                                                                       |
| $\frac{d[E]}{dt} = k_E \left( \frac{[M]}{K_M + [M]} \right) \left( \frac{[E]}{K_E + [E]} \right) + \frac{k_b[M]}{K_M + [M]} + k_{E0} + \frac{k_{p1}[CD][RE]}{K_{CD} + [RE]} + \frac{k_{p2}[CE][RE]}{K_{CE} + [RE]} - d_E[E] - k_{RE}[R][E]$ |
| $\frac{d[CD]}{dt} = \frac{k_{CD}[M]}{K_M + [M]} + \frac{k_{CDS}[S]}{K_S + [S]} - d_{CD}[CD]$                                                                                                                                                |
| $\frac{d[CE]}{dt} = \frac{k_{CE}[E]}{K_E + [E]} - d_{CE}[CE]$                                                                                                                                                                               |
| $\frac{d[R]}{dt} = k_R + \frac{k_{DP}[RP]}{K_{RP} + [RP]} - k_{RE}[R][E] - \frac{k_{p1}[CD][R]}{K_{CD} + [R]} - \frac{k_{p2}[CE][R]}{K_{CE} + [R]} - d_R[R]$                                                                                |
| $\frac{d[RP]}{dt} = \frac{k_{p1}[CD][R]}{K_{CD} + [R]} + \frac{k_{p2}[CE][R]}{K_{CE} + [R]} + \frac{k_{p1}[CD][RE]}{K_{CD} + [RE]} + \frac{k_{p2}[CE][RE]}{K_{CE} + [RE]} - \frac{k_{DP}[RP]}{K_{RP} + [RP]} - d_{RP}[RP]$                  |
| $\frac{d[RE]}{dt} = k_{RE}[R][E] - \frac{k_{p1}[CD][RE]}{K_{CD} + [RE]} - \frac{k_{p2}[CE][RE]}{K_{CE} + [RE]} - d_{RE}[RE]$                                                                                                                |

Model variables:

*S*, [serum]; *M*, Myc; *E*, E2F; *CD*, Cyclin D/Cdk4,6; *CE*, Cyclin E/Cdk2;

*R*, Rb; *RP*, phosphorylated Rb; *RE*, Rb-E2F complex

Initial condition:

[*M*] = [*E*] = [*CD*] = [*CE*] = [*RP*] = 0 nM; [*R*] = 2.65 nM; [*RE*] = 0.65 nM.

Model parameters (see Supplementary Table 2).

**Supplementary Table 2: Model parameters (adapted from ref. [21])**

| Symbol    | Values                | Description                                                             |
|-----------|-----------------------|-------------------------------------------------------------------------|
| $k_M$     | 1.0 nM/hr             | Rate constant of Myc synthesis driven by growth factors                 |
| $k_E$     | 0.4 nM/hr             | Rate constant of E2F synthesis driven by Myc and E2F                    |
| $k_b$     | 0.003 nM/hr           | Rate constant of E2F synthesis driven by Myc alone                      |
| $k_{E0}$  | 0.02 nM/hr            | Rate constant of E2F basal/constitutive synthesis                       |
| $k_{CD}$  | 0.03 nM/hr            | Rate constant of CycD synthesis driven by Myc                           |
| $k_{CDS}$ | 0.45 nM/hr            | Rate constant of CycD synthesis driven by growth factors                |
| $k_{CE}$  | 0.35 nM/hr            | Rate constant of CycE synthesis driven by E2F                           |
| $k_R$     | 0.18 nM/hr            | Rate constant of Rb constitutive synthesis                              |
| $k_{P1}$  | 18 hr <sup>-1</sup>   | Phosphorylation rate constant of Rb by CycD/Cdk4,6                      |
| $k_{P2}$  | 18 hr <sup>-1</sup>   | Phosphorylation rate constant of Rb by CycE/Cdk2                        |
| $k_{DP}$  | 3.6 nM/hr             | Dephosphorylation rate constant of Rb by phosphatases                   |
| $k_{RE}$  | 180 nM/hr             | Association rate constant of Rb and E2F                                 |
| $K_S$     | 2.8 nM                | Michaelis-Menten parameter for CycD and Myc synthesis by growth factors |
| $K_E$     | 0.15 nM               | Michaelis-Menten parameter for CycE and E2F synthesis by E2F            |
| $K_M$     | 0.15 nM               | Michaelis-Menten parameter for CycD and E2F synthesis by Myc            |
| $K_{RP}$  | 0.01 nM               | Michaelis-Menten parameter for Rb dephosphorylation                     |
| $K_{CD}$  | 0.92 nM               | Michaelis-Menten parameter for Rb phosphorylation by CycD/Cdk4,6        |
| $K_{CE}$  | 0.92 nM               | Michaelis-Menten parameter for Rb phosphorylation by CycE/Cdk2          |
| $d_M$     | 0.7 hr <sup>-1</sup>  | Degradation rate constant of Myc                                        |
| $d_E$     | 0.25 hr <sup>-1</sup> | Degradation rate constant of E2F                                        |
| $d_{CD}$  | 1.5 hr <sup>-1</sup>  | Degradation rate constant of CycD                                       |
| $d_{CE}$  | 1 hr <sup>-1</sup>    | Degradation rate constant of CycE                                       |
| $d_R$     | 0.06 hr <sup>-1</sup> | Degradation rate constant of Rb                                         |
| $d_{RP}$  | 0.06 hr <sup>-1</sup> | Degradation rate constant of phosphorylated Rb                          |
| $d_{RE}$  | 0.03 hr <sup>-1</sup> | Degradation rate constant of Rb-E2F complex                             |

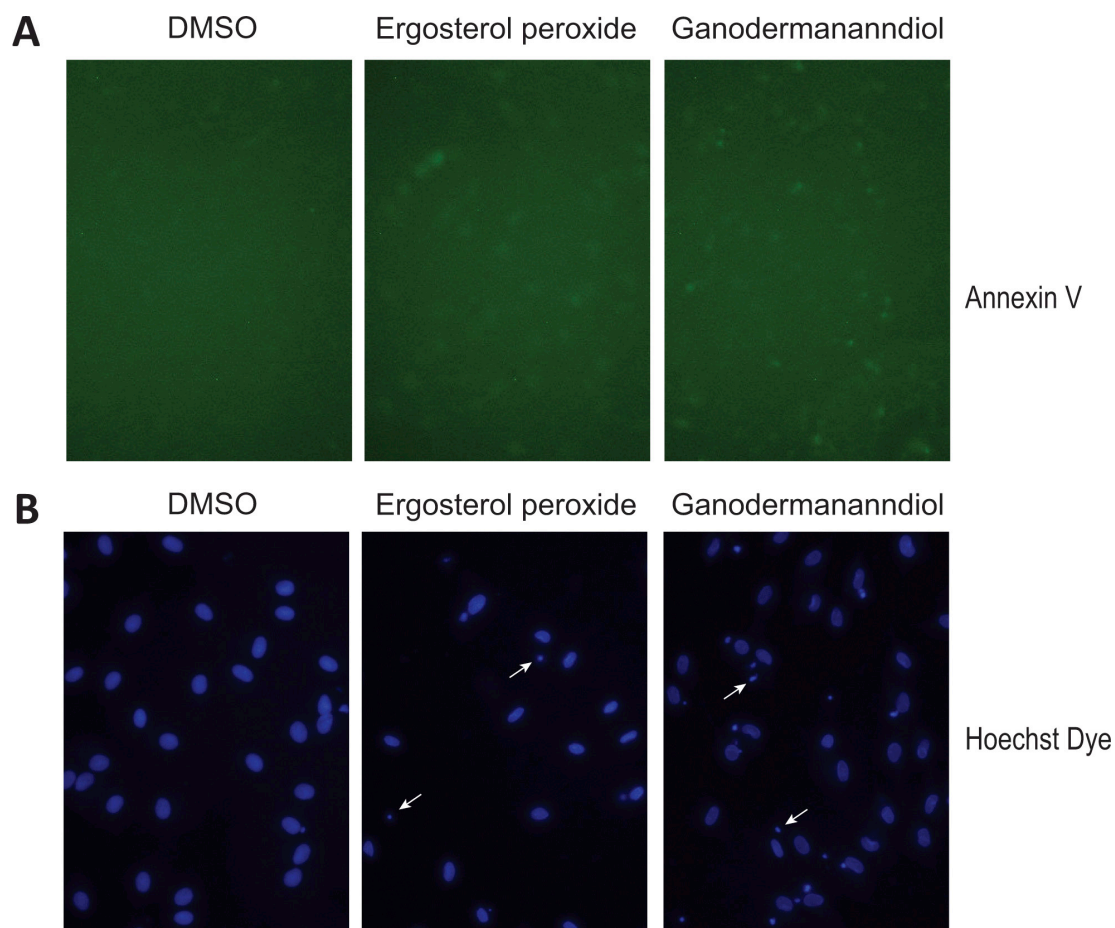

**Supplementary Figure 1: Compound-induced apoptosis in REF/E23 cell-quiescence model.** Serum starvation-induced quiescent REF/E23 cells were treated with ergosterol peroxide or ganodermananndiol at 20  $\mu\text{g/ml}$  or DMSO vehicle control. After 1 day of treatment, cells were assayed for externalization of inner membrane phospholipids to cell surface using Annexin V staining (**A**), as well as nuclei condensation and fragmentation (examples shown at arrow-pointed spots) using Hoechst dye staining (**B**), in addition to the loss of mitochondrial membrane potential using TMRE staining (Figure 2B).

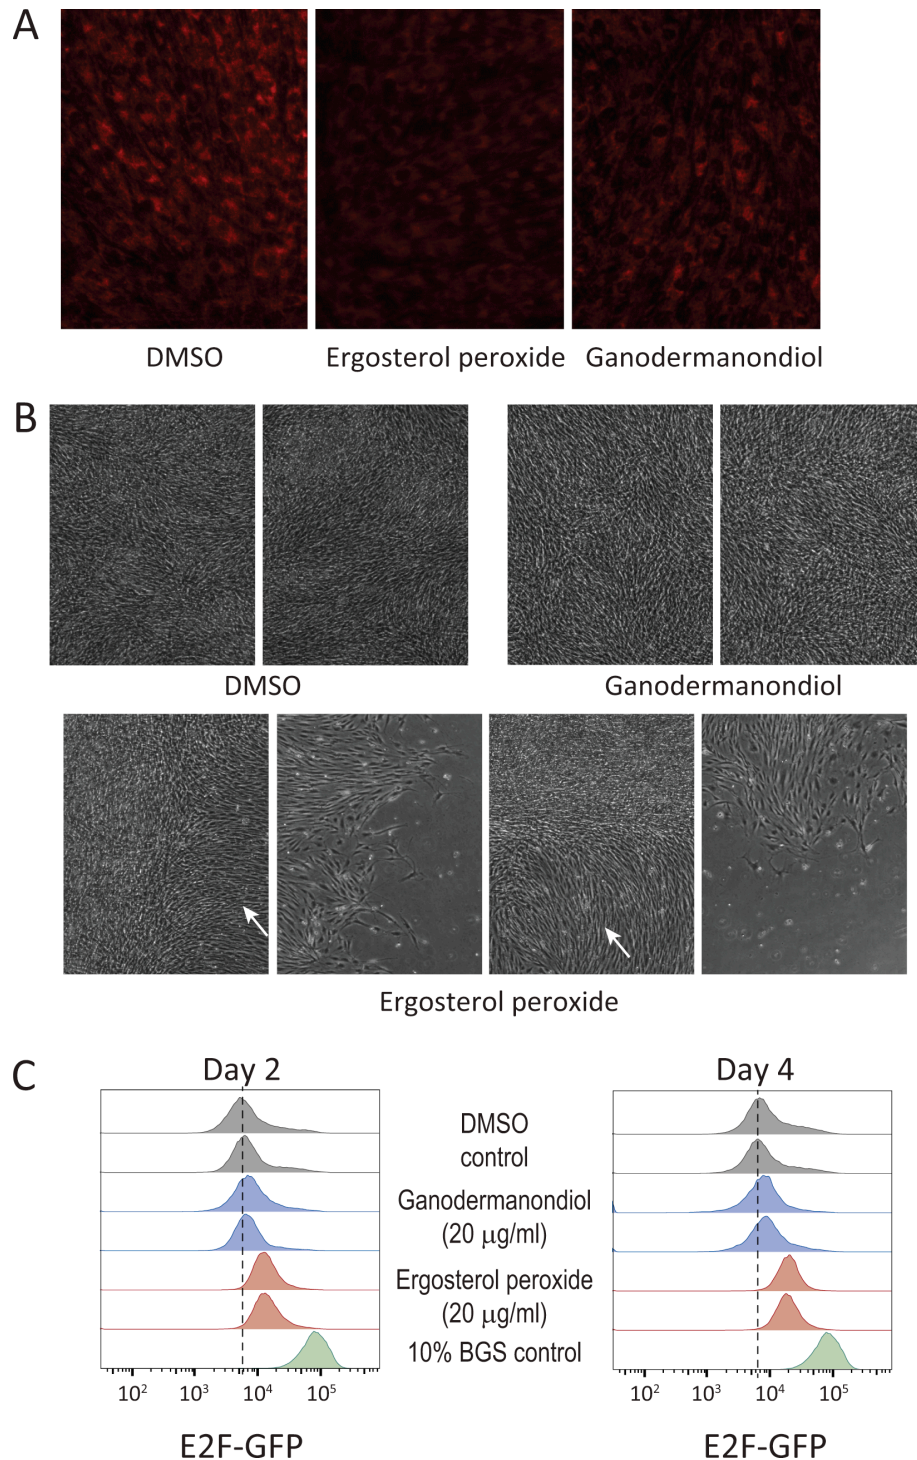

**Supplementary Figure 2: Compound-induced cytotoxicity, apoptosis, and shallow quiescence under cell contact inhibition.** REF/E23 cells were induced to quiescence by cell contact inhibition (see Methods) for 3 days, and subsequently treated with ergosterol peroxide or ganodermanondiol at 20 µg/ml or DMSO vehicle control. **(A)** Induced apoptosis. After 3 days of treatment, cells were assayed for the loss of mitochondrial membrane potential using TMRE staining. **(B)** Cytotoxicity. Cells were observed under microscope each day after the treatment initiation. At day 8, certain areas of ergosterol peroxide-treated wells (but not DMSO- or ganodermanondiol-treated wells) were seen to contain empty space or cells with significantly increased sizes (arrow-pointed). Shown are representative microscopy fields under phase contrast. **(C)** Shallower quiescent state with increased E2F expression. The E2F-GFP reporter activities were measured after 2 and 4 days of treatment by flow cytometry. The 10% BGS control refers to a population of cycling REF/E23 cells under 10% BGS without contact inhibition.

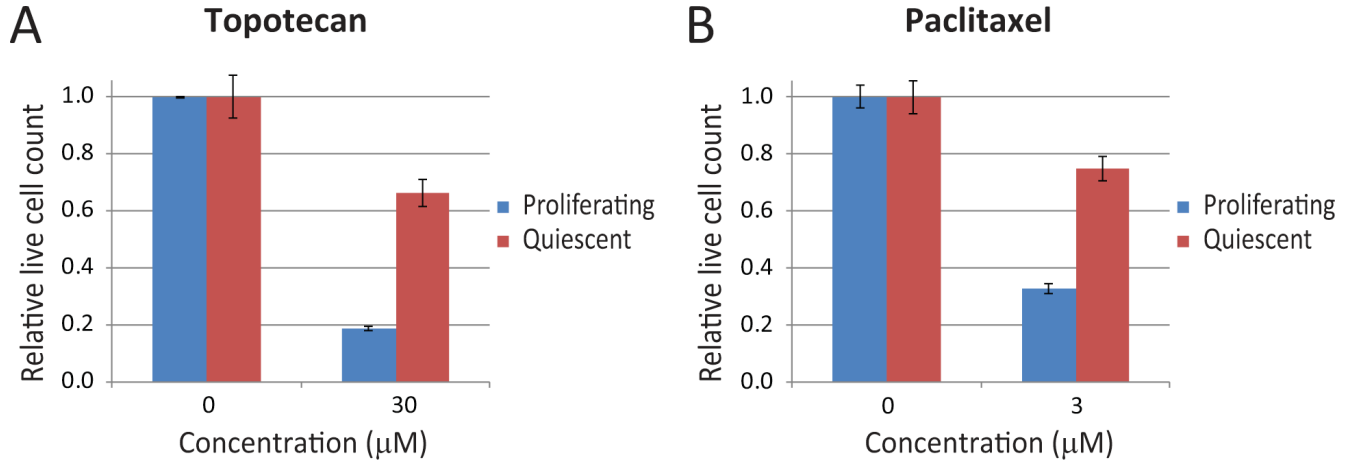

**Supplementary Figure 3: Cytotoxicity of topotecan and paclitaxel at high dose.** Actively cycling or serum starvation-induced quiescent REF/E23 cells were treated with topotecan (A) and paclitaxel (B) for 48 hours at a higher concentration than those in Figure 2C (concentration = 0: DMSO vehicle control). The relative live cell count (y-axis) was subsequently determined as in Figure 1B. Error bar indicates the standard error of the median (of four replicates).

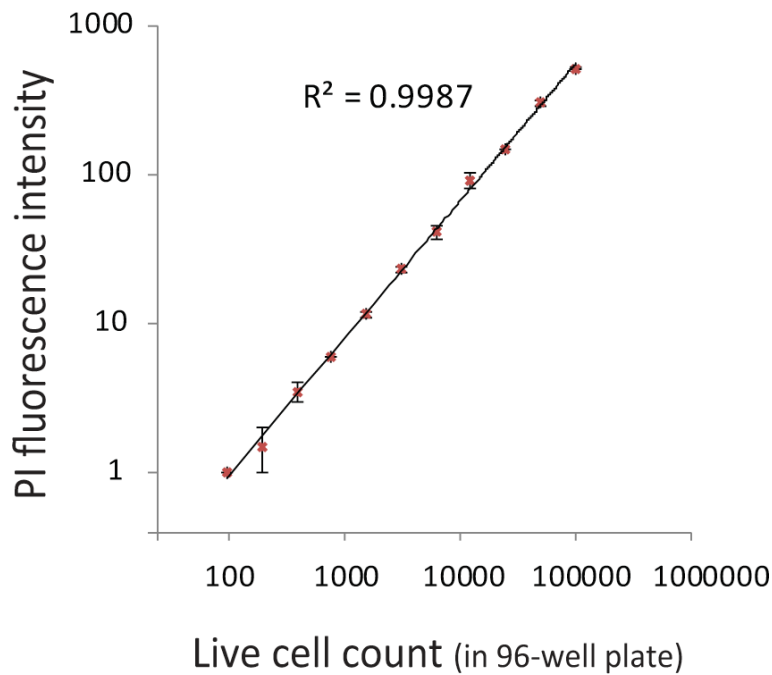

**Supplementary Figure 4: Linear relationship between PI fluorescence intensity and live cell count in PI fluorescence assay.** The PI fluorescence assay was performed as previously described [47], with 50 μg/ml of propidium iodide staining of REF/E23 cells. Each data point corresponds to the average reading from two replicates. Error bar indicates the standard error of the mean.
